# Supplementary material for: Tomato root microbiota and Phytophthora parasitica-associated disease
Source: PubMed Central journal article supplement (PMC5434524; doi:10.1186/s40168-017-0273-7), 2017-05-16
Supplement: 40168_2017_273_MOESM1_ESM.pdf [file 40168_2017_273_MOESM1_ESM.pdf]

**Table S1** Plant characteristics and soil properties at each sampling location

| Replicates     | Sample number | Plant size (cm) | Number of fruits | Soil temperature (°C) | Soil pH    |
|----------------|---------------|-----------------|------------------|-----------------------|------------|
| R1             | 1             | 85              | 8                | 17,5                  | 7,81       |
|                | 2             | 70              | 15               | 17,9                  | 8,09       |
|                | 3             | 88              | 13               | 18,1                  | 8,56       |
|                | 4             | 82              | 12               | 18                    | 8,45       |
|                | 5             | 82              | 8                | 18                    | 8,32       |
|                | 6             | 83              | 14               | 18,8                  | 8,66       |
|                | 7             | 75              | 17               | 21                    | 8,51       |
|                | 8             | 73              | 15               | 22                    | 8,54       |
|                | 9             | 80              | 17               | 21                    | 8,66       |
|                | 10            | 75              | 16               | 20                    | 8,37       |
| <b>Mean R1</b> |               | <b>79,3</b>     | <b>13,5</b>      | <b>19,2</b>           | <b>8,4</b> |
| <b>SD R1</b>   |               | <b>5,8</b>      | <b>3,3</b>       | <b>1,6</b>            | <b>0,3</b> |
| R2             | 11            | 85              | 16               | 17,2                  | 8,33       |
|                | 12            | 75              | 10               | 17,9                  | 8,49       |
|                | 13            | 87              | 11               | 18,1                  | 8,18       |
|                | 14            | 87              | 19               | 17,8                  | 8,36       |
|                | 15            | 85              | 14               | 18,4                  | 8,45       |
|                | 16            | 83              | 18               | 19                    | 8,46       |
|                | 17            | 75              | 13               | 22,4                  | 8,39       |
|                | 18            | 80              | 14               | 21,2                  | 8,28       |
|                | 19            | 81              | 20               | 21                    | 8,42       |
|                | 20            | 78              | 21               | 19,6                  | 8,71       |
| <b>Mean R2</b> |               | <b>81,6</b>     | <b>15,6</b>      | <b>19,3</b>           | <b>8,4</b> |
| <b>SD R2</b>   |               | <b>4,6</b>      | <b>3,8</b>       | <b>1,7</b>            | <b>0,1</b> |
| R3             | 21            | 84              | 18               | 17,6                  | 8,2        |
|                | 22            | 70              | 14               | 17,5                  | 8,5        |
|                | 23            | 77              | 16               | 17,9                  | 8,08       |
|                | 24            | 80              | 13               | 18,1                  | 8,55       |
|                | 25            | 85              | 15               | 18,3                  | 8,42       |
|                | 26            | 73              | 12               | 21,1                  | 8,39       |
|                | 27            | 80              | 16               | 22,9                  | 8,07       |
|                | 28            | 70              | 12               | 21,6                  | 8,37       |
|                | 29            | 83              | 17               | 21                    | 8,72       |
|                | 30            | 81              | 16               | 20,1                  | 8,7        |
| <b>Mean R3</b> |               | <b>78,3</b>     | <b>14,9</b>      | <b>19,6</b>           | <b>8,4</b> |
| <b>SD R3</b>   |               | <b>5,6</b>      | <b>2,1</b>       | <b>2,0</b>            | <b>0,2</b> |
