# Supplementary material for: Tomato root microbiota and Phytophthora parasitica-associated disease
Source: PubMed Central journal article supplement (PMC5434524; doi:10.1186/s40168-017-0273-7), 2017-05-16
Supplement: 40168_2017_273_MOESM2_ESM.pdf [file 40168_2017_273_MOESM2_ESM.pdf]

bp

MW

M1<sub>R1</sub>

M1<sub>R2</sub>

M1<sub>R3</sub>

M2<sub>R1</sub>

M2<sub>R2</sub>

M2<sub>R3</sub>

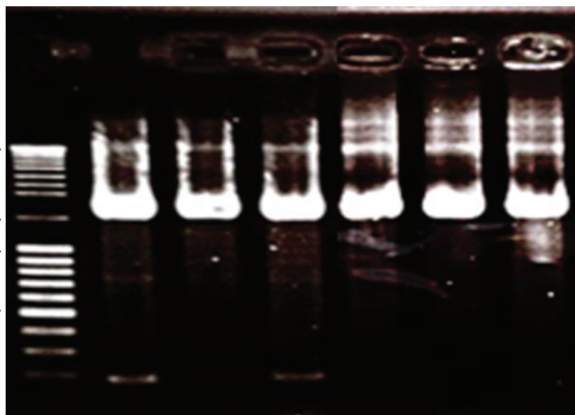

10 000 -

1500 -

1000 -

500 -
