# Supplementary material for: Tomato root microbiota and Phytophthora parasitica-associated disease
Source: PubMed Central journal article supplement (PMC5434524; doi:10.1186/s40168-017-0273-7), 2017-05-16
Supplement: 40168_2017_273_MOESM6_ESM.pdf [file 40168_2017_273_MOESM6_ESM.pdf]

**Table S4**Rhizosphere bacterial families identified in M1 or M2, and responding to the presence of *P. parasitica* biofilm

|                                   |               | M1R1  | M1R2  | M1R3  | M2R1  | M2R2  | M2R2  | Mean M1 | Mean M2 | SD M1 | SD M2 | p value |
|-----------------------------------|---------------|-------|-------|-------|-------|-------|-------|---------|---------|-------|-------|---------|
| <b>Proteobacteria</b>             | <b>phylum</b> |       |       |       |       |       |       |         |         |       |       |         |
| Alphaproteobacteria               | class         |       |       |       |       |       |       |         |         |       |       |         |
| <i>Rhizobiaceae</i>               | family        | 5,145 | 3,077 | 3,906 | 3,334 | 2,227 | 4,087 | 4,043   | 3,216   | 2,193 | 1,780 | 0,287   |
| <i>Hyphomicrobiaceae</i>          | family        | 1,229 | 1,487 | 1,304 | 0,634 | 0,949 | 0,954 | 1,340   | 0,846   | 0,679 | 0,449 | 0,022   |
| <i>Beijerinckiaceae</i>           | family        | 0,023 | 0,016 | 0,046 | 0,016 | 0,021 | 0,029 | 0,028   | 0,022   | 0,019 | 0,012 | 0,435   |
| <i>Rhizobiales_incertae_sedis</i> | family        | 0,497 | 0,407 | 0,423 | 0,242 | 0,277 | 0,321 | 0,442   | 0,280   | 0,225 | 0,144 | 0,075   |
| <i>Bradyrhizobiaceae</i>          | family        | 0,427 | 0,524 | 0,704 | 0,262 | 0,341 | 0,397 | 0,552   | 0,333   | 0,299 | 0,176 | 0,039   |
| <i>Phyllobacteriaceae</i>         | family        | 0,159 | 0,208 | 0,207 | 0,123 | 0,102 | 0,167 | 0,191   | 0,131   | 0,098 | 0,071 | 0,115   |
| <i>Rhodobiaceae</i>               | family        | 0,033 | 0,017 | 0,043 | 0,018 | 0,016 | 0,026 | 0,031   | 0,020   | 0,019 | 0,011 | 0,171   |
| <i>Methylobacteriaceae</i>        | family        | 0,095 | 0,110 | 0,193 | 0,099 | 0,202 | 0,123 | 0,133   | 0,141   | 0,079 | 0,083 | 0,873   |
| <i>Brucellaceae</i>               | family        | 0,010 | 0,005 | 0,021 | 0,010 | 0,006 | 0,011 | 0,012   | 0,009   | 0,009 | 0,005 | 0,537   |
| <i>Methylocystaceae</i>           | family        | 0,024 | 0,030 | 0,055 | 0,016 | 0,037 | 0,025 | 0,037   | 0,026   | 0,023 | 0,016 | 0,423   |
| <i>Xanthobacteraceae</i>          | family        | 0,013 | 0,006 | 0,019 | 0,006 | 0,004 | 0,009 | 0,012   | 0,006   | 0,008 | 0,004 | 0,112   |
| <i>Aurantimonadaceae</i>          | family        | 0,006 | 0,002 | 0,025 | 0,009 | 0,002 | 0,017 | 0,011   | 0,010   | 0,011 | 0,008 | 0,786   |
| <i>Bartonellaceae</i>             | family        | 0,001 | 0,000 | 0,004 | 0,001 | 0,000 | 0,001 | 0,002   | 0,001   | 0,002 | 0,001 | 0,317   |
| <i>Caulobacteraceae</i>           | family        | 4,172 | 4,745 | 3,631 | 4,494 | 4,656 | 2,843 | 4,182   | 3,997   | 2,140 | 2,160 | 0,625   |
| <i>Sphingomonadaceae</i>          | family        | 8,167 | 7,145 | 5,787 | 3,668 | 4,229 | 3,738 | 7,033   | 3,878   | 3,649 | 1,955 | 0,048   |
| <i>Erythrobacteraceae</i>         | family        | 0,528 | 0,284 | 0,283 | 0,337 | 0,301 | 0,321 | 0,365   | 0,320   | 0,216 | 0,161 | 0,598   |
| <i>Rhodospirillaceae</i>          | family        | 0,623 | 0,734 | 1,029 | 0,378 | 0,814 | 0,714 | 0,795   | 0,635   | 0,433 | 0,368 | 0,318   |
| <i>Acetobacteraceae</i>           | family        | 0,081 | 0,053 | 0,066 | 0,039 | 0,061 | 0,062 | 0,067   | 0,054   | 0,035 | 0,029 | 0,490   |
| <i>Rickettsiaceae</i>             | family        | 0,268 | 0,284 | 0,437 | 0,166 | 0,071 | 0,152 | 0,330   | 0,130   | 0,182 | 0,077 | 0,064   |
| <i>Rhodobacterales</i>            | order         | 0,030 | 0,034 | 0,037 | 0,021 | 0,063 | 0,028 | 0,034   | 0,037   | 0,017 | 0,026 | 0,790   |
| <i>Rhodobacteraceae</i>           | family        | 0,030 | 0,034 | 0,037 | 0,021 | 0,063 | 0,028 | 0,034   | 0,037   | 0,017 | 0,026 | 0,790   |
| <i>Sneathiellaceae</i>            | family        | 0,024 | 0,010 | 0,058 | 0,021 | 0,026 | 0,034 | 0,031   | 0,027   | 0,025 | 0,014 | 0,766   |

|                                       |               | M1R1  | M1R2  | M1R3  | M2R1  | M2R2  | M2R2  | Mean M1 | Mean M2 | SD M1 | SD M2 | p value |
|---------------------------------------|---------------|-------|-------|-------|-------|-------|-------|---------|---------|-------|-------|---------|
| <b>Proteobacteria</b>                 | <b>phylum</b> |       |       |       |       |       |       |         |         |       |       |         |
| Betaproteobacteria                    | class         |       |       |       |       |       |       |         |         |       |       |         |
| <i>Comamonadaceae</i>                 | family        | 0,138 | 0,176 | 0,223 | 0,282 | 0,292 | 0,272 | 0,179   | 0,282   | 0,096 | 0,141 | 0,067   |
| <i>Burkholderiales_incertae_sedis</i> | family        | 0,080 | 0,100 | 0,100 | 0,193 | 0,159 | 0,259 | 0,093   | 0,204   | 0,048 | 0,110 | 0,063   |
| <i>Oxalobacteraceae</i>               | family        | 0,024 | 0,050 | 0,064 | 0,049 | 0,036 | 0,174 | 0,046   | 0,086   | 0,028 | 0,076 | 0,389   |
| <i>Methylophilaceae</i>               | family        | 0,005 | 0,015 | 0,021 | 0,008 | 0,004 | 0,000 | 0,014   | 0,004   | 0,009 | 0,004 | 0,309   |

|                                     |               | M1R1  | M1R2  | M1R3  | M2R1  | M2R2  | M2R2  | Mean M1 | Mean M2 | SD M1 | SD M2 | p value |
|-------------------------------------|---------------|-------|-------|-------|-------|-------|-------|---------|---------|-------|-------|---------|
| <b>Proteobacteria</b>               | <b>phylum</b> |       |       |       |       |       |       |         |         |       |       |         |
| Gammaproteobacteria                 | class         |       |       |       |       |       |       |         |         |       |       |         |
| <i>Pseudomonadaceae</i>             | family        | 2,936 | 4,451 | 5,243 | 4,092 | 3,078 | 4,024 | 4,210   | 3,731   | 2,312 | 1,922 | 0,618   |
| <i>Xanthomonadaceae</i>             | family        | 0,010 | 0,013 | 0,015 | 0,008 | 0,006 | 0,011 | 0,013   | 0,008   | 0,007 | 0,005 | 0,090   |
| <i>Sinobacteraceae</i>              | family        | 2,358 | 3,252 | 5,098 | 2,770 | 7,459 | 3,281 | 3,569   | 4,503   | 2,118 | 3,079 | 0,648   |
| <i>Thiotrichaceae</i>               | family        | 0,187 | 0,336 | 0,563 | 0,210 | 0,235 | 0,229 | 0,362   | 0,225   | 0,238 | 0,113 | 0,318   |
| <i>Enterobacteriaceae</i>           | family        | 0,016 | 0,010 | 0,003 | 0,023 | 0,011 | 0,007 | 0,010   | 0,014   | 0,007 | 0,010 | 0,173   |
| <i>Chromatiaceae</i>                | family        | 0,045 | 0,189 | 0,054 | 0,093 | 0,144 | 0,037 | 0,096   | 0,091   | 0,081 | 0,063 | 0,874   |
| <i>Thiotrichales_incertae_sedis</i> | family        | 0,040 | 0,179 | 0,038 | 0,088 | 0,140 | 0,029 | 0,086   | 0,086   | 0,079 | 0,062 | 0,999   |
| <i>Alteromonadaceae</i>             | family        | 0,067 | 0,057 | 0,147 | 0,015 | 0,021 | 0,017 | 0,090   | 0,018   | 0,061 | 0,009 | 0,130   |
| <i>Ectothiorhodospiraceae</i>       | family        | 0,068 | 0,104 | 0,054 | 0,062 | 0,093 | 0,019 | 0,075   | 0,058   | 0,043 | 0,042 | 0,198   |
| <i>Piscirickettsiaceae</i>          | family        | 0,068 | 0,104 | 0,054 | 0,062 | 0,093 | 0,019 | 0,075   | 0,058   | 0,043 | 0,042 | 0,198   |
| <i>Coxiellaceae</i>                 | family        | 0,010 | 0,013 | 0,009 | 0,006 | 0,004 | 0,004 | 0,010   | 0,005   | 0,006 | 0,003 | 0,073   |

|                           |               | M1R1  | M1R2  | M1R3  | M2R1  | M2R2  | M2R2  | Mean M1 | Mean M2 | SD M1 | SD M2 | p value |
|---------------------------|---------------|-------|-------|-------|-------|-------|-------|---------|---------|-------|-------|---------|
| <b>Proteobacteria</b>     | <b>phylum</b> |       |       |       |       |       |       |         |         |       |       |         |
| Deltaproteobacteria       | class         |       |       |       |       |       |       |         |         |       |       |         |
| <i>Polyangiaceae</i>      | family        | 0,021 | 0,254 | 0,193 | 0,052 | 0,075 | 0,062 | 0,156   | 0,063   | 0,126 | 0,033 | 0,280   |
| <i>Phaselicystidaceae</i> | family        | 0,007 | 0,028 | 0,154 | 0,005 | 0,010 | 0,009 | 0,063   | 0,008   | 0,072 | 0,005 | 0,347   |
| <i>Myxococcaceae</i>      | family        | 0,028 | 0,208 | 0,213 | 0,099 | 0,157 | 0,050 | 0,150   | 0,102   | 0,114 | 0,067 | 0,551   |
| <i>Cystobacteraceae</i>   | family        | 0,024 | 0,282 | 0,115 | 0,060 | 0,112 | 0,043 | 0,140   | 0,072   | 0,128 | 0,046 | 0,368   |
| <i>Kofleriaceae</i>       | family        | 0,004 | 0,053 | 0,046 | 0,004 | 0,018 | 0,008 | 0,034   | 0,010   | 0,028 | 0,008 | 0,181   |
| <i>Nannocystaceae</i>     | family        | 0,010 | 0,026 | 0,023 | 0,011 | 0,023 | 0,007 | 0,020   | 0,014   | 0,012 | 0,010 | 0,385   |
| <i>Bacterivoracaceae</i>  | family        | 0,023 | 0,145 | 0,090 | 0,073 | 0,172 | 0,060 | 0,086   | 0,102   | 0,066 | 0,071 | 0,568   |
| <i>Bdellovibrionaceae</i> | family        | 0,003 | 0,003 | 0,089 | 0,000 | 0,004 | 0,000 | 0,032   | 0,001   | 0,044 | 0,002 | 0,411   |

|                            |               | M1R1   | M1R2   | M1R3   | M2R1   | M2R2   | M2R2   | Mean M1 | Mean M2 | SD M1 | SD M2 | p value |
|----------------------------|---------------|--------|--------|--------|--------|--------|--------|---------|---------|-------|-------|---------|
| <b>Bacteroidetes</b>       | <b>phylum</b> |        |        |        |        |        |        |         |         |       |       |         |
| <i>Flavobacteriaceae</i>   | family        | 41,240 | 26,005 | 19,071 | 44,755 | 34,522 | 46,201 | 28,772  | 41,826  | 9,213 | 6,367 | 0,079   |
| <i>Cryomorphaceae</i>      | family        | 0,728  | 0,656  | 0,504  | 0,367  | 1,022  | 0,358  | 0,630   | 0,582   | 0,114 | 0,381 | 0,423   |
| <i>Cytophagaceae</i>       | family        | 0,953  | 0,841  | 0,813  | 0,653  | 0,840  | 0,778  | 0,869   | 0,757   | 0,074 | 0,095 | 0,091   |
| <i>Flammeovirgaceae</i>    | family        | 0,051  | 0,067  | 0,057  | 0,045  | 0,125  | 0,032  | 0,058   | 0,067   | 0,008 | 0,051 | 0,387   |
| <i>Sphingobacteriaceae</i> | family        | 0,507  | 0,716  | 1,022  | 0,282  | 0,500  | 0,266  | 0,748   | 0,350   | 0,259 | 0,131 | 0,038   |
| <i>Chitinophagaceae</i>    | family        | 0,200  | 0,570  | 0,307  | 0,209  | 0,341  | 0,176  | 0,359   | 0,242   | 0,190 | 0,087 | 0,193   |
| <i>Saprosiraceae</i>       | family        | 0,018  | 0,032  | 0,009  | 0,007  | 0,009  | 0,007  | 0,020   | 0,007   | 0,001 | 0,001 | 0,067   |
| <i>Cyclobacteriaceae</i>   | family        | 0,013  | 0,007  | 0,010  | 0,009  | 0,016  | 0,010  | 0,010   | 0,012   | 0,003 | 0,004 | 0,287   |
| <i>Prevotellaceae</i>      | family        | 0,009  | 0,009  | 0,002  | 0,003  | 0,009  | 0,007  | 0,007   | 0,006   | 0,004 | 0,003 | 0,440   |
