# Supplementary material for: Tomato root microbiota and Phytophthora parasitica-associated disease
Source: PubMed Central journal article supplement (PMC5434524; doi:10.1186/s40168-017-0273-7), 2017-05-16
Supplement: 40168_2017_273_MOESM7_ESM.pdf [file 40168_2017_273_MOESM7_ESM.pdf]

**Table S5**

16S gene count statistics (20 march 2017)

<https://rrndb.umms.med.umich.edu/>

| Phylum           | Genomes | Range    | Mode | Median | Mean | Std Dev |
|------------------|---------|----------|------|--------|------|---------|
| Acidobacteria    | 18      | [1 - 2]  | 1    | 1.0    | 1.3  | 0.5     |
| Actinobacteria   | 687     | [1 - 9]  | 4    | 3      | 3.3  | 1.7     |
| Bacteroidetes    | 215     | [1 - 13] | 3    | 3      | 3.7  | 1.9     |
| Chloroflexi      | 27      | [1 - 3]  | 1    | 1      | 1.5  | 0.7     |
| Fibrobacteres    | 2       | [3 - 3]  | 3    | 3      | 3.00 | 0.00    |
| Firmicutes       | 1352    | [1 - 16] | 6    | 6      | 7    | 3.0     |
| Fibrobacter      | 2       | [3 - 3]  | 3    | 3      | 3.00 | 0       |
| Gemmatimonadetes | 3       | [1 - 2]  | 2    | 2      | 1.7  | 0.5     |
| Nitrospirae      | 8       | [1 - 3]  | 1    | 1.5    | 1.6  | 0.7     |
| Planctomycetes   | 13      | [1 - 8]  | —    | 2      | 2.5  | 1.8     |
| Proteobacteria   | 3424    | [1 - 15] | 7    | 4      | 4.7  | 2.5     |

  

| Family                     | Genomes | Range    | Mode | Median | Mean | Std Dev |
|----------------------------|---------|----------|------|--------|------|---------|
| <i>Rhodospirillaceae</i>   | 19      | [1 - 10] | 4    | 4      | 4.5  | 3.0     |
| <i>Sphingomonadaceae</i>   | 44      | [1 - 3]  |      | 2      | 2.2  | 0.8     |
| <i>Caulobacteraceae</i>    | 7       | [1 - 3]  | 2    | 2      | 2.00 | 0.53    |
| <i>Hyphomicrobiaceae</i>   | 14      | [1 - 3]  | 1    | 1.5    | 1.7  | 0.8     |
| <i>Rhizobiaceae</i>        | 116     | [1-6]    | 3    | 3      | 2.6  | 1.0     |
| <i>Sinobacteriaceae</i>    | nd      | nd       | nd   | nd     | nd   | nd      |
| <i>Pseudomonadaceae</i>    | 229     | [2 - 8]  | 4    | 4      | 4.8  | 1.2     |
| <i>Sphingobacteriaceae</i> | 10      | [3 - 8]  | 4    | 4      | 5    | 1.7     |
| <i>Cryomorphaceae</i>      | 1       | [1 - 2]  | 2    | 2      | 2    | 0       |
| <i>Flavobacteriaceae</i>   | 93      | [1 - 13] | 3    | 3      | 3.9  | 2.1     |
