# Supplementary material for: Tomato root microbiota and Phytophthora parasitica-associated disease
Source: PubMed Central journal article supplement (PMC5434524; doi:10.1186/s40168-017-0273-7), 2017-05-16

**A** zoospores (dpi 8)

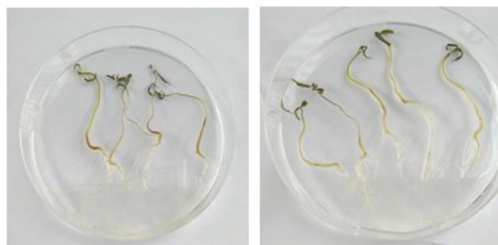

**B** control (dpi 8)

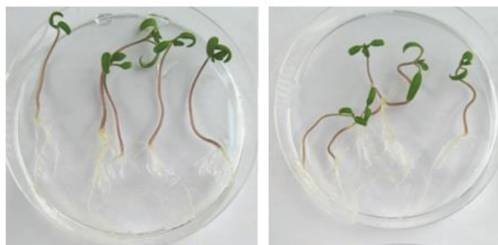

**C** zoospores + bacterial strains (dpi 8)

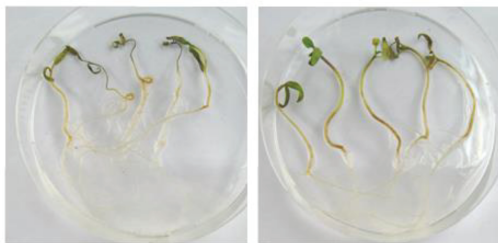

*E. Coli*

**D** bacterial strains (dpi 8)

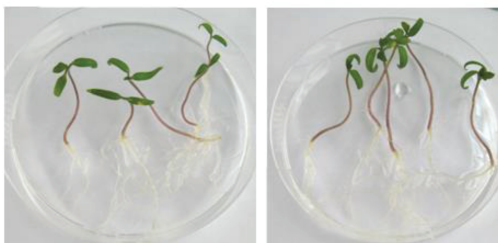

I-3G9

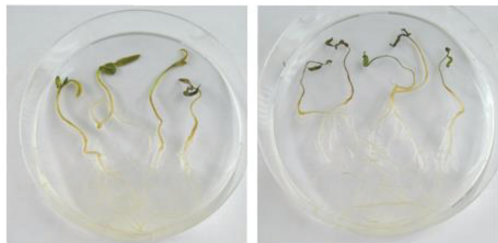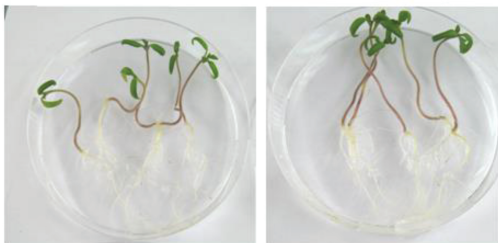

I-1G6

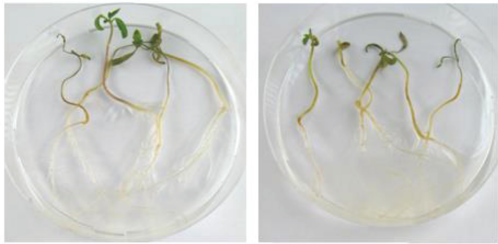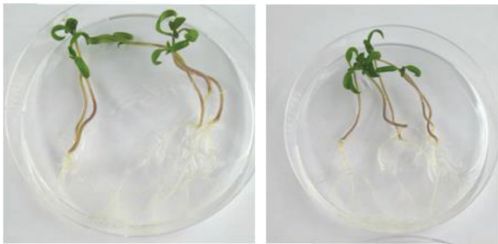

I-1G3

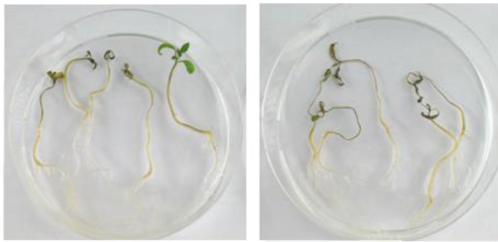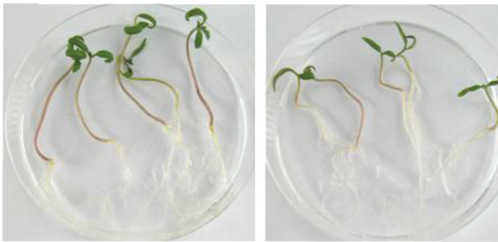

Supplement: 40168_2017_273_MOESM9_ESM.pdf [file 40168_2017_273_MOESM9_ESM.pdf]
