# Supplementary material for: Tomato root microbiota and Phytophthora parasitica-associated disease
Source: PubMed Central journal article supplement (PMC5434524; doi:10.1186/s40168-017-0273-7), 2017-05-16

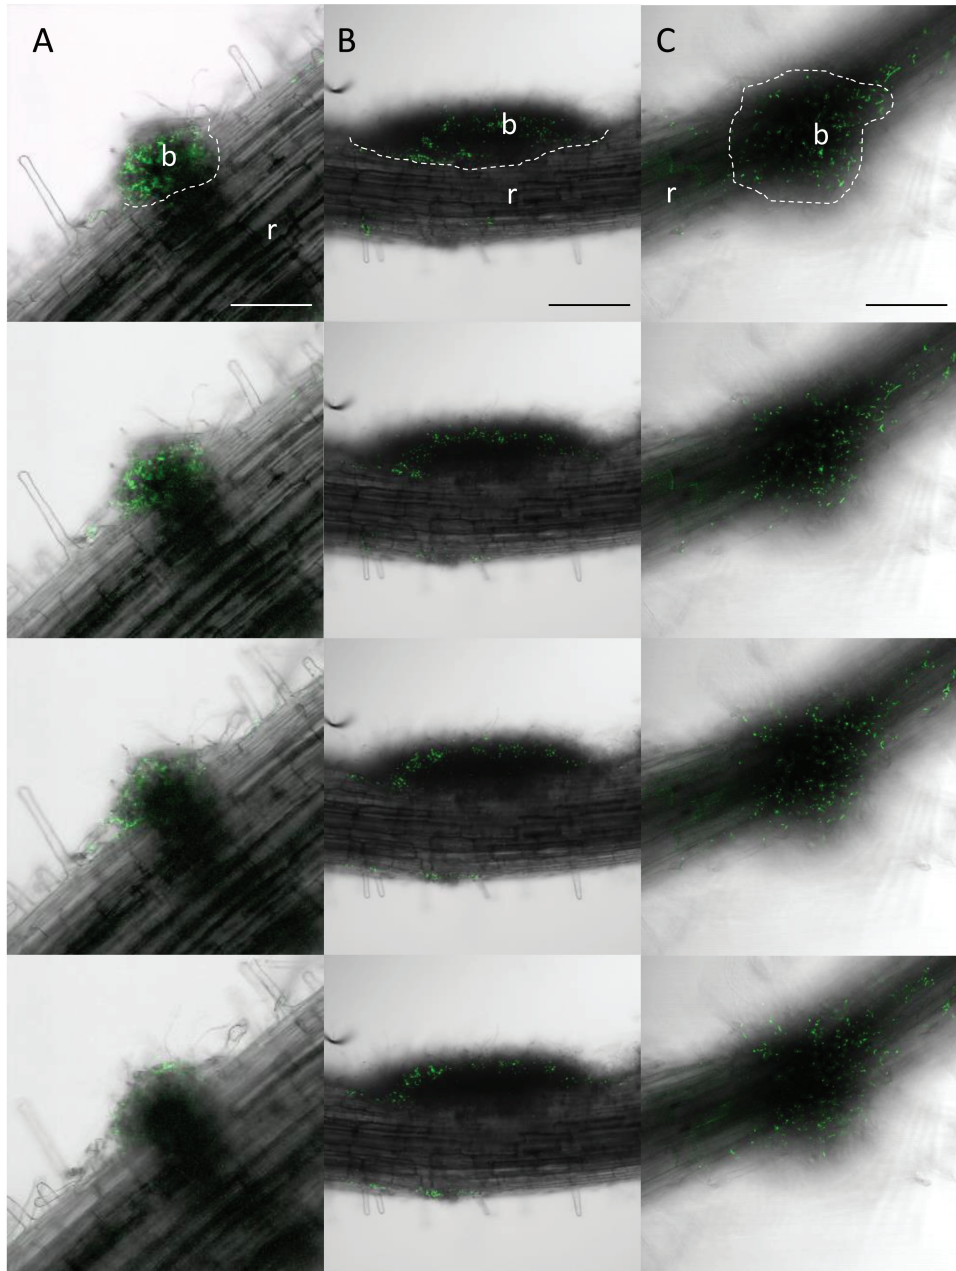

Supplement: 40168_2017_273_MOESM10_ESM.pdf [file 40168_2017_273_MOESM10_ESM.pdf]
